# Supplementary material for: Differentially expressed genes associated with resistance to red palm weevil (Rhynchophorus ferrugineus) infestation in coconut (Cocos nucifera L.) and identification of rSNP markers in disease resistance genes
Source: Research Square preprint supplement (doi:10.21203/rs.3.rs-7994557/v1), 2026-01-08
Supplement: Supplementary file 1 [file 256bb3aed4b1f1b55064dc8d.docx]

**Additional file 1**

| **No** | **Sample ID** | **Variety** | **Field** | **Phenotype** |
| --- | --- | --- | --- | --- |
| 1 | P_L_I_27 | Pandan | Infested | Low infestation |
| 2 | P_L_I_28 | Pandan | Infested | Low infestation |
| 3 | P_L_I_30 | Pandan | Infested | Low infestation |
| 4 | P_H_I_31 | Pandan | Infested | High infestation |
| 5 | P_H_I_32 | Pandan | Infested | High infestation |
| 6 | P_H_I_33 | Pandan | Infested | High infestation |
| 7 | 15:P_H_I_33 | Pandan | Infested | High infestation |
| 8 | MT_L_I_35 | Malayan Tall | Infested | Low infestation |
| 9 | MT_H_I_36 | Malayan Tall | Infested | High infestation |
| 10 | MT_L_I_37 | Malayan Tall | Infested | Low infestation |
| 11 | MT_H_I_35 | Malayan Tall | Infested | High infestation |
| 12 | MYD_H_I_1 | MYD | Infested | High infestation |
| 13 | MYD_H_I_2 | MYD | Infested | Low infestation |
| 14 | MYD_H_I_3 | MYD | Infested | Low infestation |
| 15 | P_C_NI_10 | Pandan | Control | Non-infested |
| 16 | P_C_NI_11 | Pandan | Control | Non-infested |
| 17 | P_C_NI_13 | Pandan | Control | Non-infested |
| 18 | P_C_NI_14 | Pandan | Control | Non-infested |
| 19 | MT_C_NI_19 | Malayan Tall | Control | Non-infested |
| 20 | MT_C_NI_20 | Malayan Tall | Control | Non-infested |
| 21 | MT_C_NI_21 | Malayan Tall | Control | Non-infested |
| 22 | MT_C_NI_22 | Malayan Tall | Control | Non-infested |
| 23 | MYD_C_NI_5 | MYD | Control | Non-infested |
| 24 | MYD_C_NI_6 | MYD | Control | Non-infested |
| 25 | MYD_C_NI_7 | MYD | Control | Non-infested |
| 26 | MYD_C_NI_8 | MYD | Control | Non-infested |
| 27 | MYD_C_NI_9 | MYD | Control | Non-infested |

**Additional file 2**

**List of primers for qPCR reaction.**

| Target gene | Sense sequence (5' - 3') | Anti-sense sequence (5' - 3') |
| --- | --- | --- |
| *CneIF-4γ* | CACCAGGAGACTTGGGAACT | CAGCTTACCAACCACTTCACC |
| *CnEF-1α* | GAGATCCTCACCAAGATTGACAG | CACCATAGGTTTAGTGGGAATCA |
| G245724 | CGCCCAATCGGAACAATCAT | TTGTTTCCGTTCAGCACCAG |
| G328289 | AGGAAGCCTTACCAACCTCC | GCATCCCTGGCATCCTCTAT |
| G358391 | GCAAGTGAAGCTACAGAGGC | TTTCGTGTGGCTGGAGATCT |
| G358392 | CCTGAGGTTGGTGTTTGACA | GCTTTCTCCTTCACCTGCCT |
| G359637 | CGGGAAGGCGTATTGTTGAG | GCTGGCAAAACATCTGGACA |
| G2812948 | ATTCGTTACTGGGTGGCAGA | AGCAAGGGAACGTAGCAGAT |

**Additional file 3**

**Gene promoter regions used for SNP variant calling.**

| **Chromosome** | **GeneID** | **Promoters start position** | **Promoter end position** | **Strand** |
| --- | --- | --- | --- | --- |
| GWHBEBU00000010 | g245727 | 6210615 | 6213615 | - |
| GWHBEBU00000011 | g281948 | 129531390 | 129534390 | - |
| GWHBEBU00000016 | g359637 | 61983406 | 61986406 | - |
| GWHBEBU00000014 | g328289 | 46630428 | 46633428 | + |
| GWHBEBU00000003 | g76386 | 62715632 | 62718632 | - |
| GWHBEBU00000016 | g358392 | 53651901 | 53654901 | - |
| GWHBEBU00000003 | g76349 | 62555097 | 62558097 | - |
| GWHBEBU00000016 | g358054 | 50901625 | 50904625 | + |
| GWHBEBU00000004 | g92818 | 3077378 | 3080378 | + |
| GWHBEBU00000007 | g197387 | 160168031 | 160171031 | + |
| GWHBEBU00000003 | g71602 | 39410706 | 39413706 | + |
| GWHBEBU00000003 | g71639 | 39572851 | 39575851 | + |
| GWHBEBU00000016 | g358391 | 53649576 | 53652576 | - |
| GWHBEBU00000005 | g135681 | 69778353 | 69781353 | + |
| GWHBEBU00000004 | g93313 | 4742557 | 4745557 | - |
| GWHBEBU00000005 | g121929 | 3679476 | 3682476 | + |
| GWHBEBU00000011 | g281649 | 128181953 | 128184953 | + |
