# Supplementary material for: Differentially expressed genes associated with resistance to red palm weevil (Rhynchophorus ferrugineus) infestation in coconut (Cocos nucifera L.) and identification of rSNP markers in disease resistance genes
Source: Research Square preprint supplement (doi:10.21203/rs.3.rs-7994557/v1), 2026-01-08
Supplement: Supplementary file 2 [file 5ee83729bb11966d5d85509f.xlsx]

## Sheet: Sheet1
F_P_I_R1	DRRA240007861-1a	41749956	6.26G	41018360	6.15G	0.01	98.63	96.33	48.39
F_P_I_R2	DRRA240007862-1a	40662960	6.1G	39903480	5.99G	0.01	98.56	96.23	48.55
F_P_I_R3	DRRA240007863-1a	48826082	7.32G	47738722	7.16G	0.01	98.74	96.62	49.44
F_MT_I_R1	DRRA240007865-1a	44007176	6.6G	42947922	6.44G	0.01	98.67	96.43	48.78
F_MT_I_R2	DRRA240007866-1a	47229268	7.08G	46260232	6.94G	0.01	98.98	97.16	48.62
F_MT_I_R3	DRRA240007867-1a	51475150	7.72G	49098080	7.36G	0.01	98.8	96.76	48.35
F_MYD_I_R1	DRRA240007870-1a	48832448	7.32G	47670014	7.15G	0.01	98.65	96.4	48.39
F_MYD_I_R2	DRRA240007871-1a	45826510	6.87G	45021292	6.75G	0.01	98.67	96.45	49.12
F_MYD_I_R3	DRRA240007872-1a	43027268	6.45G	42243828	6.34G	0.01	98.33	95.57	48.97
F_P_C_R1	DRRA240007873-1a	42986170	6.45G	42336802	6.35G	0.01	98.4	95.7	48.92
F_P_C_R2	DRRA240007874-1a	47295348	7.09G	46396932	6.96G	0.01	98.46	95.89	48.88
F_P_C_R3	DRRA240007875-1a	42505264	6.38G	41699764	6.25G	0.01	98.64	96.37	49.1
F_MT_C_R1	DRRA240007876-1a	43500950	6.53G	42775330	6.42G	0.01	98.71	96.52	49.02
F_MT_C_R2	DRRA240007877-1a	44459080	6.67G	43541868	6.53G	0.01	98.76	96.59	49.02
F_MT_C_R3	DRRA240007878-1a	46207806	6.93G	45386314	6.81G	0.01	98.76	96.65	49.25
F_MYD_C_R1	DRRA240007879-1a	41009602	6.15G	40315210	6.05G	0.01	98.69	96.49	49.39
F_MYD_C_R2	DRRA240007880-1a	52560846	7.88G	51796536	7.77G	0.01	98.7	96.53	49.21
F_MYD_C_R3	DRRA240007881-1a	41668436	6.25G	39955112	5.99G	0.01	98.38	95.74	49.09
