# Supplementary material for: Differentially expressed genes associated with resistance to red palm weevil (Rhynchophorus ferrugineus) infestation in coconut (Cocos nucifera L.) and identification of rSNP markers in disease resistance genes
Source: Research Square preprint supplement (doi:10.21203/rs.3.rs-7994557/v1), 2026-01-08
Supplement: Supplementary file 3 [file 7e721917df99ddbc56551768.xlsx]

## Sheet: Sheet1
Category	GOID	Description	GeneRatio	BgRatio	pvalue	padj	geneID	geneName	Count	Up	Up_Gene_id	Down	Down_Gene_id
CC	GO:0005840	ribosome	144/954	304/2571	6.24956694759399e-05	0.00843692	g202660/g9507/g364084/g315340/g7936/g338963/g284003/g67715/g30074/g26096/g178587/g319679/g178880/g173968/g26688/g34371/g281378/g66190/g25187/g151619/g330765/g338001/g59114/g127742/g358487/g60748/g278860/g174153/g266375/g176267/g225711/g218672/g113681/g179568/g201376/g242104/g110554/g169871/g151237/g239837/g71494/g206014/g64810/g197971/g335595/g338315/g283917/g67110/g84041/novel.1353/g302468/g7304…	g202660/g9507/g364084/g315340/g7936/g338963/g284003/g67715/g30074/g26096/g178587/g319679/g178880/g173968/g26688/g34371/g281378/g66190/g25187/g151619/g330765/g338001/g59114/g127742/g358487/g60748/g278860/g174153/g266375/g176267/g225711/g218672/g113681/g179568/g201376/g242104/g110554/g169871/g151237/g239837/g71494/g206014/g64810/g197971/g335595/g338315/g283917/g67110/g84041/-/g302468/g73040/g62366/…	144	6	g202660/g67715/g283917/g335311/g122488/g75327	138	g9507/g364084/g315340/g7936/g338963/g284003/g30074/g26096/g178587/g319679/g178880/g173968/g26688/g34371/g281378/g66190/g25187/g151619/g330765/g338001/g59114/g127742/g358487/g60748/g278860/g174153/g266375/g176267/g225711/g218672/g113681/g179568/g201376/g242104/g110554/g169871/g151237/g239837/g71494/g206014/g64810/g197971/g335595/g338315/g67110/g84041/novel.1353/g302468/g73040/g62366/g222279/g18166…
MF	GO:0046527	glucosyltransferase activity	52/4447	90/11684	0.000110406	0.0367651	g223627/g176405/g201802/g304418/g63490/g316181/g264334/g51553/g127956/g338011/g110591/g257788/g175770/g180630/g180658/g74789/g284937/g242686/g198828/g40164/g110590/g175788/g263703/g304412/g71335/g66848/g170388/g300509/g124882/g919/g71336/g170392/g59013/g180655/g891/g228788/g906/g126130/g199641/g40166/g321360/g106591/g266744/g928/g206484/g281857/g40044/g60627/g117648/g266503/g957/g175787	g223627/g176405/g201802/g304418/g63490/g316181/g264334/g51553/g127956/g338011/g110591/g257788/g175770/g180630/g180658/g74789/g284937/g242686/g198828/g40164/g110590/g175788/g263703/g304412/g71335/g66848/g170388/g300509/g124882/g919/g71336/g170392/g59013/g180655/g891/g228788/g906/g126130/g199641/g40166/g321360/g106591/g266744/g928/g206484/g281857/g40044/g60627/g117648/g266503/g957/g175787	52	19	g304418/g63490/g180630/g180658/g40164/g304412/g66848/g170388/g300509/g170392/g59013/g126130/g199641/g40166/g266744/g206484/g60627/g266503/g957	33	g223627/g176405/g201802/g316181/g264334/g51553/g127956/g338011/g110591/g257788/g175770/g74789/g284937/g242686/g198828/g110590/g175788/g263703/g71335/g124882/g919/g71336/g180655/g891/g228788/g906/g321360/g106591/g928/g281857/g40044/g117648/g175787
