# Supplementary material for: Differentially expressed genes associated with resistance to red palm weevil (Rhynchophorus ferrugineus) infestation in coconut (Cocos nucifera L.) and identification of rSNP markers in disease resistance genes
Source: Research Square preprint supplement (doi:10.21203/rs.3.rs-7994557/v1), 2026-01-08
Supplement: Supplementary file 4 [file 92eb8181477c48c3f7be9e73.xlsx]

## Sheet: Sheet1
Category	GOID	Description	GeneRatio	BgRatio	pvalue	padj	geneID	geneName	Count	Up	Up_Gene_id	Down	Down_Gene_id
CC	GO:0005798	Golgi-associated vesicle	19/620	29/2546	2.78088356305604e-06	5.52204021806843e-05	g663/g57219/g175710/g264947/g263003/g61412/g220079/g263005/g287323/g305143/g151943/g68084/g127873/g335024/g204016/g121642/g194134/g194143/g89838	g663/g57219/g175710/g264947/g263003/g61412/g220079/g263005/g287323/g305143/g151943/g68084/g127873/g335024/g204016/g121642/g194134/g194143/g89838	19	19	g663/g57219/g175710/g264947/g263003/g61412/g220079/g263005/g287323/g305143/g151943/g68084/g127873/g335024/g204016/g121642/g194134/g194143/g89838	0
CC	GO:0012506	vesicle membrane	19/620	29/2546	2.78088356305604e-06	5.52204021806843e-05	g663/g57219/g175710/g264947/g263003/g61412/g220079/g263005/g287323/g305143/g151943/g68084/g127873/g335024/g204016/g121642/g194134/g194143/g89838	g663/g57219/g175710/g264947/g263003/g61412/g220079/g263005/g287323/g305143/g151943/g68084/g127873/g335024/g204016/g121642/g194134/g194143/g89838	19	19	g663/g57219/g175710/g264947/g263003/g61412/g220079/g263005/g287323/g305143/g151943/g68084/g127873/g335024/g204016/g121642/g194134/g194143/g89838	0
CC	GO:0030120	vesicle coat	19/620	29/2546	2.78088356305604e-06	5.52204021806843e-05	g663/g57219/g175710/g264947/g263003/g61412/g220079/g263005/g287323/g305143/g151943/g68084/g127873/g335024/g204016/g121642/g194134/g194143/g89838	g663/g57219/g175710/g264947/g263003/g61412/g220079/g263005/g287323/g305143/g151943/g68084/g127873/g335024/g204016/g121642/g194134/g194143/g89838	19	19	g663/g57219/g175710/g264947/g263003/g61412/g220079/g263005/g287323/g305143/g151943/g68084/g127873/g335024/g204016/g121642/g194134/g194143/g89838	0
CC	GO:0030135	coated vesicle	19/620	29/2546	2.78088356305604e-06	5.52204021806843e-05	g663/g57219/g175710/g264947/g263003/g61412/g220079/g263005/g287323/g305143/g151943/g68084/g127873/g335024/g204016/g121642/g194134/g194143/g89838	g663/g57219/g175710/g264947/g263003/g61412/g220079/g263005/g287323/g305143/g151943/g68084/g127873/g335024/g204016/g121642/g194134/g194143/g89838	19	19	g663/g57219/g175710/g264947/g263003/g61412/g220079/g263005/g287323/g305143/g151943/g68084/g127873/g335024/g204016/g121642/g194134/g194143/g89838	0
CC	GO:0030659	cytoplasmic vesicle membrane	19/620	29/2546	2.78088356305604e-06	5.52204021806843e-05	g663/g57219/g175710/g264947/g263003/g61412/g220079/g263005/g287323/g305143/g151943/g68084/g127873/g335024/g204016/g121642/g194134/g194143/g89838	g663/g57219/g175710/g264947/g263003/g61412/g220079/g263005/g287323/g305143/g151943/g68084/g127873/g335024/g204016/g121642/g194134/g194143/g89838	19	19	g663/g57219/g175710/g264947/g263003/g61412/g220079/g263005/g287323/g305143/g151943/g68084/g127873/g335024/g204016/g121642/g194134/g194143/g89838	0
CC	GO:0030660	Golgi-associated vesicle membrane	19/620	29/2546	2.78088356305604e-06	5.52204021806843e-05	g663/g57219/g175710/g264947/g263003/g61412/g220079/g263005/g287323/g305143/g151943/g68084/g127873/g335024/g204016/g121642/g194134/g194143/g89838	g663/g57219/g175710/g264947/g263003/g61412/g220079/g263005/g287323/g305143/g151943/g68084/g127873/g335024/g204016/g121642/g194134/g194143/g89838	19	19	g663/g57219/g175710/g264947/g263003/g61412/g220079/g263005/g287323/g305143/g151943/g68084/g127873/g335024/g204016/g121642/g194134/g194143/g89838	0
CC	GO:0030662	coated vesicle membrane	19/620	29/2546	2.78088356305604e-06	5.52204021806843e-05	g663/g57219/g175710/g264947/g263003/g61412/g220079/g263005/g287323/g305143/g151943/g68084/g127873/g335024/g204016/g121642/g194134/g194143/g89838	g663/g57219/g175710/g264947/g263003/g61412/g220079/g263005/g287323/g305143/g151943/g68084/g127873/g335024/g204016/g121642/g194134/g194143/g89838	19	19	g663/g57219/g175710/g264947/g263003/g61412/g220079/g263005/g287323/g305143/g151943/g68084/g127873/g335024/g204016/g121642/g194134/g194143/g89838	0
CC	GO:0030117	membrane coat	26/620	49/2546	1.18037803052208e-05	0.000176301	g663/g57219/g175710/g62213/g264947/g263003/g61412/g201752/g220079/g321860/g263005/g287323/g305143/g229343/g151943/g262499/g68084/g127873/g32840/g335024/g204016/g121642/g200460/g194134/g194143/g89838	g663/g57219/g175710/g62213/g264947/g263003/g61412/g201752/g220079/g321860/g263005/g287323/g305143/g229343/g151943/g262499/g68084/g127873/g32840/g335024/g204016/g121642/g200460/g194134/g194143/g89838	26	26	g663/g57219/g175710/g62213/g264947/g263003/g61412/g201752/g220079/g321860/g263005/g287323/g305143/g229343/g151943/g262499/g68084/g127873/g32840/g335024/g204016/g121642/g200460/g194134/g194143/g89838	0
CC	GO:0048475	coated membrane	26/620	49/2546	1.18037803052208e-05	0.000176301	g663/g57219/g175710/g62213/g264947/g263003/g61412/g201752/g220079/g321860/g263005/g287323/g305143/g229343/g151943/g262499/g68084/g127873/g32840/g335024/g204016/g121642/g200460/g194134/g194143/g89838	g663/g57219/g175710/g62213/g264947/g263003/g61412/g201752/g220079/g321860/g263005/g287323/g305143/g229343/g151943/g262499/g68084/g127873/g32840/g335024/g204016/g121642/g200460/g194134/g194143/g89838	26	26	g663/g57219/g175710/g62213/g264947/g263003/g61412/g201752/g220079/g321860/g263005/g287323/g305143/g229343/g151943/g262499/g68084/g127873/g32840/g335024/g204016/g121642/g200460/g194134/g194143/g89838	0
CC	GO:0031410	cytoplasmic vesicle	20/620	34/2546	1.64886024359885e-05	0.000176301	g663/g57219/g175710/g264947/g263003/g61412/g220079/g263005/g287323/g305143/g151943/g68084/g127873/g201554/g335024/g204016/g121642/g194134/g194143/g89838	g663/g57219/g175710/g264947/g263003/g61412/g220079/g263005/g287323/g305143/g151943/g68084/g127873/g201554/g335024/g204016/g121642/g194134/g194143/g89838	20	19	g663/g57219/g175710/g264947/g263003/g61412/g220079/g263005/g287323/g305143/g151943/g68084/g127873/g335024/g204016/g121642/g194134/g194143/g89838	1	g201554
CC	GO:0031982	vesicle	20/620	34/2546	1.64886024359885e-05	0.000176301	g663/g57219/g175710/g264947/g263003/g61412/g220079/g263005/g287323/g305143/g151943/g68084/g127873/g201554/g335024/g204016/g121642/g194134/g194143/g89838	g663/g57219/g175710/g264947/g263003/g61412/g220079/g263005/g287323/g305143/g151943/g68084/g127873/g201554/g335024/g204016/g121642/g194134/g194143/g89838	20	19	g663/g57219/g175710/g264947/g263003/g61412/g220079/g263005/g287323/g305143/g151943/g68084/g127873/g335024/g204016/g121642/g194134/g194143/g89838	1	g201554
CC	GO:0044433	cytoplasmic vesicle part	20/620	34/2546	1.64886024359885e-05	0.000176301	g663/g57219/g175710/g264947/g263003/g61412/g220079/g263005/g287323/g305143/g151943/g68084/g127873/g201554/g335024/g204016/g121642/g194134/g194143/g89838	g663/g57219/g175710/g264947/g263003/g61412/g220079/g263005/g287323/g305143/g151943/g68084/g127873/g201554/g335024/g204016/g121642/g194134/g194143/g89838	20	19	g663/g57219/g175710/g264947/g263003/g61412/g220079/g263005/g287323/g305143/g151943/g68084/g127873/g335024/g204016/g121642/g194134/g194143/g89838	1	g201554
CC	GO:0097708	intracellular vesicle	20/620	34/2546	1.64886024359885e-05	0.000176301	g663/g57219/g175710/g264947/g263003/g61412/g220079/g263005/g287323/g305143/g151943/g68084/g127873/g201554/g335024/g204016/g121642/g194134/g194143/g89838	g663/g57219/g175710/g264947/g263003/g61412/g220079/g263005/g287323/g305143/g151943/g68084/g127873/g201554/g335024/g204016/g121642/g194134/g194143/g89838	20	19	g663/g57219/g175710/g264947/g263003/g61412/g220079/g263005/g287323/g305143/g151943/g68084/g127873/g335024/g204016/g121642/g194134/g194143/g89838	1	g201554
CC	GO:0012505	endomembrane system	49/620	124/2546	8.93751861213918e-05	0.000887368	g149358/g663/g57219/g175710/g264947/g263003/g61412/g220079/g32856/g263005/g159246/g74836/g287323/g305143/g60775/g121504/g301123/g181611/g147511/g279783/g151943/g114887/g55885/g68084/g127873/g201554/g276782/g332535/g264552/g332462/g335024/g204016/g355151/g121642/g200799/g3757/g127092/g265612/g68794/g60773/g255905/g194134/g287424/g194143/g109260/g89838/g177495/g319379/g285019	g149358/g663/g57219/g175710/g264947/g263003/g61412/g220079/g32856/g263005/g159246/g74836/g287323/g305143/g60775/g121504/g301123/g181611/g147511/g279783/g151943/g114887/g55885/g68084/g127873/g201554/g276782/g332535/g264552/g332462/g335024/g204016/g355151/g121642/g200799/g3757/g127092/g265612/g68794/g60773/g255905/g194134/g287424/g194143/g109260/g89838/g177495/g319379/g285019	49	42	g149358/g663/g57219/g175710/g264947/g263003/g61412/g220079/g263005/g74836/g287323/g305143/g60775/g121504/g301123/g181611/g147511/g279783/g151943/g114887/g55885/g68084/g127873/g276782/g332535/g264552/g332462/g335024/g204016/g355151/g121642/g200799/g3757/g68794/g60773/g255905/g194134/g287424/g194143/g109260/g89838/g285019	7	g32856/g159246/g201554/g127092/g265612/g177495/g319379
CC	GO:0030126	COPI vesicle coat	8/620	2546-10-01	0.000332198	0.00271621	g663/g57219/g175710/g263003/g220079/g263005/g127873/g89838	g663/g57219/g175710/g263003/g220079/g263005/g127873/g89838	8	8	g663/g57219/g175710/g263003/g220079/g263005/g127873/g89838	0
CC	GO:0030137	COPI-coated vesicle	8/620	2546-10-01	0.000332198	0.00271621	g663/g57219/g175710/g263003/g220079/g263005/g127873/g89838	g663/g57219/g175710/g263003/g220079/g263005/g127873/g89838	8	8	g663/g57219/g175710/g263003/g220079/g263005/g127873/g89838	0
CC	GO:0030663	COPI-coated vesicle membrane	8/620	2546-10-01	0.000332198	0.00271621	g663/g57219/g175710/g263003/g220079/g263005/g127873/g89838	g663/g57219/g175710/g263003/g220079/g263005/g127873/g89838	8	8	g663/g57219/g175710/g263003/g220079/g263005/g127873/g89838	0
CC	GO:0005794	Golgi apparatus	17/620	34/2546	0.000986812	0.00721931	g663/g57219/g175710/g263003/g220079/g263005/g301123/g279783/g151943/g114887/g127873/g335024/g200799/g127092/g89838/g177495/g319379	g663/g57219/g175710/g263003/g220079/g263005/g301123/g279783/g151943/g114887/g127873/g335024/g200799/g127092/g89838/g177495/g319379	17	14	g663/g57219/g175710/g263003/g220079/g263005/g301123/g279783/g151943/g114887/g127873/g335024/g200799/g89838	3	g127092/g177495/g319379
CC	GO:0044431	Golgi apparatus part	17/620	34/2546	0.000986812	0.00721931	g663/g57219/g175710/g263003/g220079/g263005/g301123/g279783/g151943/g114887/g127873/g335024/g200799/g127092/g89838/g177495/g319379	g663/g57219/g175710/g263003/g220079/g263005/g301123/g279783/g151943/g114887/g127873/g335024/g200799/g127092/g89838/g177495/g319379	17	14	g663/g57219/g175710/g263003/g220079/g263005/g301123/g279783/g151943/g114887/g127873/g335024/g200799/g89838	3	g127092/g177495/g319379
CC	GO:0030133	transport vesicle	11/620	19/2546	0.00174912	0.0115775	g264947/g61412/g287323/g305143/g151943/g68084/g335024/g204016/g121642/g194134/g194143	g264947/g61412/g287323/g305143/g151943/g68084/g335024/g204016/g121642/g194134/g194143	11	11	g264947/g61412/g287323/g305143/g151943/g68084/g335024/g204016/g121642/g194134/g194143	0
CC	GO:0030658	transport vesicle membrane	11/620	19/2546	0.00174912	0.0115775	g264947/g61412/g287323/g305143/g151943/g68084/g335024/g204016/g121642/g194134/g194143	g264947/g61412/g287323/g305143/g151943/g68084/g335024/g204016/g121642/g194134/g194143	11	11	g264947/g61412/g287323/g305143/g151943/g68084/g335024/g204016/g121642/g194134/g194143	0
CC	GO:0098796	membrane protein complex	69/620	215/2546	0.00441471	0.027893	g245427/g663/g57219/g70929/g221653/g175710/g93648/g62213/g264947/g263003/g304745/g61412/g201752/g303536/g220079/g335157/g321860/g263005/g316529/g338125/g335178/g66848/g287323/g151673/g204204/g53692/g147171/g87005/g305143/g60775/g222072/g229343/g320603/g151943/g262499/g68084/g282056/g127873/g28987/g201554/g32840/g264552/g361247/g88396/g74324/g53907/g335024/g71811/g204016/novel.176/g121642/g260155/…	g245427/g663/g57219/g70929/g221653/g175710/g93648/g62213/g264947/g263003/g304745/g61412/g201752/g303536/g220079/g335157/g321860/g263005/g316529/g338125/g335178/g66848/g287323/g151673/g204204/g53692/g147171/g87005/g305143/g60775/g222072/g229343/g320603/g151943/g262499/g68084/g282056/g127873/g28987/g201554/g32840/g264552/g361247/g88396/g74324/g53907/g335024/g71811/g204016/-/g121642/g260155/g200460/…	69	45	g663/g57219/g221653/g175710/g62213/g264947/g263003/g61412/g201752/g220079/g335157/g321860/g263005/g335178/g66848/g287323/g151673/g204204/g305143/g60775/g229343/g320603/g151943/g262499/g68084/g127873/g28987/g32840/g264552/g53907/g335024/g71811/g204016/g121642/g200460/g64441/g68794/g185271/g60773/g255905/g194134/g287424/g194143/g109260/g89838	24	g245427/g70929/g93648/g304745/g303536/g316529/g338125/g53692/g147171/g87005/g222072/g282056/g201554/g361247/g88396/g74324/novel.176/g260155/g265612/g74168/g363826/g243278/g303713/g300536
CC	GO:0044425	membrane part	73/620	232/2546	0.00597406	0.0323635	g245427/g663/g57219/g70929/g221653/g175710/g93648/g62213/g264947/g263003/g304745/g61412/g201752/g303536/g220079/g335157/g321860/g263005/g159246/g316529/g74836/g338125/g335178/g66848/g287323/g151673/g204204/g53692/g147171/g87005/g305143/g60775/g222072/g229343/g320603/g151943/g55885/g262499/g68084/g282056/g127873/g28987/g201554/g276782/g32840/g264552/g361247/g88396/g74324/g53907/g335024/g71811/g204…	g245427/g663/g57219/g70929/g221653/g175710/g93648/g62213/g264947/g263003/g304745/g61412/g201752/g303536/g220079/g335157/g321860/g263005/g159246/g316529/g74836/g338125/g335178/g66848/g287323/g151673/g204204/g53692/g147171/g87005/g305143/g60775/g222072/g229343/g320603/g151943/g55885/g262499/g68084/g282056/g127873/g28987/g201554/g276782/g32840/g264552/g361247/g88396/g74324/g53907/g335024/g71811/g204…	73	48	g663/g57219/g221653/g175710/g62213/g264947/g263003/g61412/g201752/g220079/g335157/g321860/g263005/g74836/g335178/g66848/g287323/g151673/g204204/g305143/g60775/g229343/g320603/g151943/g55885/g262499/g68084/g127873/g28987/g276782/g32840/g264552/g53907/g335024/g71811/g204016/g121642/g200460/g64441/g68794/g185271/g60773/g255905/g194134/g287424/g194143/g109260/g89838	25	g245427/g70929/g93648/g304745/g303536/g159246/g316529/g338125/g53692/g147171/g87005/g222072/g282056/g201554/g361247/g88396/g74324/novel.176/g260155/g265612/g74168/g363826/g243278/g303713/g300536
CC	GO:0012507	ER to Golgi transport vesicle membrane	9/620	16/2546	0.0060536	0.0323635	g264947/g61412/g287323/g305143/g68084/g204016/g121642/g194134/g194143	g264947/g61412/g287323/g305143/g68084/g204016/g121642/g194134/g194143	9	9	g264947/g61412/g287323/g305143/g68084/g204016/g121642/g194134/g194143	0
CC	GO:0030127	COPII vesicle coat	9/620	16/2546	0.0060536	0.0323635	g264947/g61412/g287323/g305143/g68084/g204016/g121642/g194134/g194143	g264947/g61412/g287323/g305143/g68084/g204016/g121642/g194134/g194143	9	9	g264947/g61412/g287323/g305143/g68084/g204016/g121642/g194134/g194143	0
CC	GO:0030134	COPII-coated ER to Golgi transport vesicle	9/620	16/2546	0.0060536	0.0323635	g264947/g61412/g287323/g305143/g68084/g204016/g121642/g194134/g194143	g264947/g61412/g287323/g305143/g68084/g204016/g121642/g194134/g194143	9	9	g264947/g61412/g287323/g305143/g68084/g204016/g121642/g194134/g194143	0
