# Supplementary material for: Differentially expressed genes associated with resistance to red palm weevil (Rhynchophorus ferrugineus) infestation in coconut (Cocos nucifera L.) and identification of rSNP markers in disease resistance genes
Source: Research Square preprint supplement (doi:10.21203/rs.3.rs-7994557/v1), 2026-01-08
Supplement: Supplementary file 5 [file a8bdad90158c31bdfe1f43be.xlsx]

## Sheet: Sheet1
Category	GOID	Description	GeneRatio	BgRatio	pvalue	padj	geneID	geneName	Count	Up	Up_Gene_id	Down	Down_Gene_id
BP	GO:0005984	disaccharide metabolic process	21/1344	44/6763	2.82550423765854e-05	0.0100281	g315355/g110590/g65047/g65046/g54338/g124494/g262603/g111987/g55840/g128596/g106237/g201933/g176140/g56681/g170392/g29079/g314424/g281857/g170388/g176139/g58806	g315355/g110590/g65047/g65046/g54338/g124494/g262603/g111987/g55840/g128596/g106237/g201933/g176140/g56681/g170392/g29079/g314424/g281857/g170388/g176139/g58806	21	17	g315355/g110590/g65047/g65046/g124494/g262603/g111987/g55840/g128596/g106237/g201933/g176140/g56681/g29079/g314424/g281857/g176139	4	g54338/g170392/g170388/g58806
BP	GO:0005992	trehalose biosynthetic process	15/1344	27/6763	4.24919179929625e-05	0.0100281	g65047/g65046/g54338/g124494/g262603/g111987/g128596/g106237/g201933/g176140/g56681/g29079/g314424/g176139/g58806	g65047/g65046/g54338/g124494/g262603/g111987/g128596/g106237/g201933/g176140/g56681/g29079/g314424/g176139/g58806	15	13	g65047/g65046/g124494/g262603/g111987/g128596/g106237/g201933/g176140/g56681/g29079/g314424/g176139	2	g54338/g58806
BP	GO:0005991	trehalose metabolic process	16/1344	31/6763	7.79559052324026e-05	0.0122651	g65047/g65046/g54338/g124494/g262603/g111987/g55840/g128596/g106237/g201933/g176140/g56681/g29079/g314424/g176139/g58806	g65047/g65046/g54338/g124494/g262603/g111987/g55840/g128596/g106237/g201933/g176140/g56681/g29079/g314424/g176139/g58806	16	14	g65047/g65046/g124494/g262603/g111987/g55840/g128596/g106237/g201933/g176140/g56681/g29079/g314424/g176139	2	g54338/g58806
BP	GO:0046351	disaccharide biosynthetic process	15/1344	29/6763	0.000126669	0.0149469	g65047/g65046/g54338/g124494/g262603/g111987/g128596/g106237/g201933/g176140/g56681/g29079/g314424/g176139/g58806	g65047/g65046/g54338/g124494/g262603/g111987/g128596/g106237/g201933/g176140/g56681/g29079/g314424/g176139/g58806	15	13	g65047/g65046/g124494/g262603/g111987/g128596/g106237/g201933/g176140/g56681/g29079/g314424/g176139	2	g54338/g58806
BP	GO:0009311	oligosaccharide metabolic process	21/1344	49/6763	0.000196992	0.018596	g315355/g110590/g65047/g65046/g54338/g124494/g262603/g111987/g55840/g128596/g106237/g201933/g176140/g56681/g170392/g29079/g314424/g281857/g170388/g176139/g58806	g315355/g110590/g65047/g65046/g54338/g124494/g262603/g111987/g55840/g128596/g106237/g201933/g176140/g56681/g170392/g29079/g314424/g281857/g170388/g176139/g58806	21	17	g315355/g110590/g65047/g65046/g124494/g262603/g111987/g55840/g128596/g106237/g201933/g176140/g56681/g29079/g314424/g281857/g176139	4	g54338/g170392/g170388/g58806
BP	GO:0015979	photosynthesis	24/1344	61/6763	0.000342467	0.0215647	g1606/g363826/g70931/g87005/g338125/g174064/g222072/g204156/g205053/g245427/g93648/g242956/g70116/g303536/g259005/g262438/g260276/g314981/g74324/g53692/g243276/g70109/g6119/g88396	g1606/g363826/g70931/g87005/g338125/g174064/g222072/g204156/g205053/g245427/g93648/g242956/g70116/g303536/g259005/g262438/g260276/g314981/g74324/g53692/g243276/g70109/g6119/g88396	24	1	g242956	23	g1606/g363826/g70931/g87005/g338125/g174064/g222072/g204156/g205053/g245427/g93648/g70116/g303536/g259005/g262438/g260276/g314981/g74324/g53692/g243276/g70109/g6119/g88396
BP	GO:0009890	negative regulation of biosynthetic process	10/1344	17/6763	0.000458769	0.0215647	g318487/g318440/g318619/g318662/g318558/g318549/g257924/g172171/g318472/g318601	g318487/g318440/g318619/g318662/g318558/g318549/g257924/g172171/g318472/g318601	10	10	g318487/g318440/g318619/g318662/g318558/g318549/g257924/g172171/g318472/g318601	0
BP	GO:0010558	negative regulation of macromolecule biosynthetic process	10/1344	17/6763	0.000458769	0.0215647	g318487/g318440/g318619/g318662/g318558/g318549/g257924/g172171/g318472/g318601	g318487/g318440/g318619/g318662/g318558/g318549/g257924/g172171/g318472/g318601	10	10	g318487/g318440/g318619/g318662/g318558/g318549/g257924/g172171/g318472/g318601	0
BP	GO:0031327	negative regulation of cellular biosynthetic process	10/1344	17/6763	0.000458769	0.0215647	g318487/g318440/g318619/g318662/g318558/g318549/g257924/g172171/g318472/g318601	g318487/g318440/g318619/g318662/g318558/g318549/g257924/g172171/g318472/g318601	10	10	g318487/g318440/g318619/g318662/g318558/g318549/g257924/g172171/g318472/g318601	0
BP	GO:2000113	negative regulation of cellular macromolecule biosynthetic process	10/1344	17/6763	0.000458769	0.0215647	g318487/g318440/g318619/g318662/g318558/g318549/g257924/g172171/g318472/g318601	g318487/g318440/g318619/g318662/g318558/g318549/g257924/g172171/g318472/g318601	10	10	g318487/g318440/g318619/g318662/g318558/g318549/g257924/g172171/g318472/g318601	0
BP	GO:0009064	glutamine family amino acid metabolic process	8/1344	6763-12-01	0.000548255	0.0215647	g320925/g282345/g117281/g29096/g1899/g360384/g53141/g314343	g320925/g282345/g117281/g29096/g1899/g360384/g53141/g314343	8	4	g320925/g282345/g117281/g360384	4	g29096/g1899/g53141/g314343
BP	GO:0009084	glutamine family amino acid biosynthetic process	8/1344	6763-12-01	0.000548255	0.0215647	g320925/g282345/g117281/g29096/g1899/g360384/g53141/g314343	g320925/g282345/g117281/g29096/g1899/g360384/g53141/g314343	8	4	g320925/g282345/g117281/g360384	4	g29096/g1899/g53141/g314343
BP	GO:0017148	negative regulation of translation	9/1344	15/6763	0.000736192	0.0248202	g318487/g318440/g318619/g318662/g318558/g318549/g257924/g318472/g318601	g318487/g318440/g318619/g318662/g318558/g318549/g257924/g318472/g318601	9	9	g318487/g318440/g318619/g318662/g318558/g318549/g257924/g318472/g318601	0
BP	GO:0034249	negative regulation of cellular amide metabolic process	9/1344	15/6763	0.000736192	0.0248202	g318487/g318440/g318619/g318662/g318558/g318549/g257924/g318472/g318601	g318487/g318440/g318619/g318662/g318558/g318549/g257924/g318472/g318601	9	9	g318487/g318440/g318619/g318662/g318558/g318549/g257924/g318472/g318601	0
BP	GO:0009312	oligosaccharide biosynthetic process	15/1344	34/6763	0.00111102	0.03496	g65047/g65046/g54338/g124494/g262603/g111987/g128596/g106237/g201933/g176140/g56681/g29079/g314424/g176139/g58806	g65047/g65046/g54338/g124494/g262603/g111987/g128596/g106237/g201933/g176140/g56681/g29079/g314424/g176139/g58806	15	13	g65047/g65046/g124494/g262603/g111987/g128596/g106237/g201933/g176140/g56681/g29079/g314424/g176139	2	g54338/g58806
CC	GO:0009523	photosystem II	17/509	38/2581	0.000366174	0.0127234	g1606/g363826/g70931/g87005/g338125/g174064/g222072/g204156/g205053/g245427/g93648/g242956/g262438/g260276/g314981/g243276/g88396	g1606/g363826/g70931/g87005/g338125/g174064/g222072/g204156/g205053/g245427/g93648/g242956/g262438/g260276/g314981/g243276/g88396	17	1	g242956	16	g1606/g363826/g70931/g87005/g338125/g174064/g222072/g204156/g205053/g245427/g93648/g262438/g260276/g314981/g243276/g88396
CC	GO:0044436	thylakoid part	22/509	55/2581	0.000371221	0.0127234	g1606/g363826/g70931/g87005/g338125/g174064/g222072/g204156/g205053/g245427/g93648/g242956/g303536/g262438/g260276/g314981/g74324/g53692/g243276/g6119/g78446/g88396	g1606/g363826/g70931/g87005/g338125/g174064/g222072/g204156/g205053/g245427/g93648/g242956/g303536/g262438/g260276/g314981/g74324/g53692/g243276/g6119/g78446/g88396	22	1	g242956	21	g1606/g363826/g70931/g87005/g338125/g174064/g222072/g204156/g205053/g245427/g93648/g303536/g262438/g260276/g314981/g74324/g53692/g243276/g6119/g78446/g88396
CC	GO:0009521	photosystem	21/509	52/2581	0.00043188	0.0127234	g1606/g363826/g70931/g87005/g338125/g174064/g222072/g204156/g205053/g245427/g93648/g242956/g303536/g262438/g260276/g314981/g74324/g53692/g243276/g6119/g88396	g1606/g363826/g70931/g87005/g338125/g174064/g222072/g204156/g205053/g245427/g93648/g242956/g303536/g262438/g260276/g314981/g74324/g53692/g243276/g6119/g88396	21	1	g242956	20	g1606/g363826/g70931/g87005/g338125/g174064/g222072/g204156/g205053/g245427/g93648/g303536/g262438/g260276/g314981/g74324/g53692/g243276/g6119/g88396
CC	GO:0034357	photosynthetic membrane	21/509	52/2581	0.00043188	0.0127234	g1606/g363826/g70931/g87005/g338125/g174064/g222072/g204156/g205053/g245427/g93648/g242956/g303536/g262438/g260276/g314981/g74324/g53692/g243276/g6119/g88396	g1606/g363826/g70931/g87005/g338125/g174064/g222072/g204156/g205053/g245427/g93648/g242956/g303536/g262438/g260276/g314981/g74324/g53692/g243276/g6119/g88396	21	1	g242956	20	g1606/g363826/g70931/g87005/g338125/g174064/g222072/g204156/g205053/g245427/g93648/g303536/g262438/g260276/g314981/g74324/g53692/g243276/g6119/g88396
CC	GO:0009579	thylakoid	22/509	56/2581	0.00050092	0.0127234	g1606/g363826/g70931/g87005/g338125/g174064/g222072/g204156/g205053/g245427/g93648/g242956/g303536/g262438/g260276/g314981/g74324/g53692/g243276/g6119/g78446/g88396	g1606/g363826/g70931/g87005/g338125/g174064/g222072/g204156/g205053/g245427/g93648/g242956/g303536/g262438/g260276/g314981/g74324/g53692/g243276/g6119/g78446/g88396	22	1	g242956	21	g1606/g363826/g70931/g87005/g338125/g174064/g222072/g204156/g205053/g245427/g93648/g303536/g262438/g260276/g314981/g74324/g53692/g243276/g6119/g78446/g88396
MF	GO:0030597	RNA glycosylase activity	2253-09-01	15/11800	0.000543193	0.0411683	g318487/g318440/g318619/g318662/g318558/g318549/g257924/g318472/g318601	g318487/g318440/g318619/g318662/g318558/g318549/g257924/g318472/g318601	9	9	g318487/g318440/g318619/g318662/g318558/g318549/g257924/g318472/g318601	0
MF	GO:0030598	rRNA N-glycosylase activity	2253-09-01	15/11800	0.000543193	0.0411683	g318487/g318440/g318619/g318662/g318558/g318549/g257924/g318472/g318601	g318487/g318440/g318619/g318662/g318558/g318549/g257924/g318472/g318601	9	9	g318487/g318440/g318619/g318662/g318558/g318549/g257924/g318472/g318601	0
MF	GO:0000155	phosphorelay sensor kinase activity	2253-11-01	22/11800	0.00105223	0.0411683	g332267/g362028/g52799/g170565/g24581/novel.782/g227298/g106581/g320059/g178112/g121480	g332267/g362028/g52799/g170565/g24581/-/g227298/g106581/g320059/g178112/g121480	11	7	g332267/g52799/g170565/g24581/novel.782/g106581/g178112	4	g362028/g227298/g320059/g121480
MF	GO:0004673	protein histidine kinase activity	2253-11-01	22/11800	0.00105223	0.0411683	g332267/g362028/g52799/g170565/g24581/novel.782/g227298/g106581/g320059/g178112/g121480	g332267/g362028/g52799/g170565/g24581/-/g227298/g106581/g320059/g178112/g121480	11	7	g332267/g52799/g170565/g24581/novel.782/g106581/g178112	4	g362028/g227298/g320059/g121480
MF	GO:0004871	signal transducer activity	2253-11-01	22/11800	0.00105223	0.0411683	g332267/g362028/g52799/g170565/g24581/novel.782/g227298/g106581/g320059/g178112/g121480	g332267/g362028/g52799/g170565/g24581/-/g227298/g106581/g320059/g178112/g121480	11	7	g332267/g52799/g170565/g24581/novel.782/g106581/g178112	4	g362028/g227298/g320059/g121480
MF	GO:0016775	phosphotransferase activity, nitrogenous group as acceptor	2253-11-01	22/11800	0.00105223	0.0411683	g332267/g362028/g52799/g170565/g24581/novel.782/g227298/g106581/g320059/g178112/g121480	g332267/g362028/g52799/g170565/g24581/-/g227298/g106581/g320059/g178112/g121480	11	7	g332267/g52799/g170565/g24581/novel.782/g106581/g178112	4	g362028/g227298/g320059/g121480
MF	GO:0038023	signaling receptor activity	2253-11-01	22/11800	0.00105223	0.0411683	g332267/g362028/g52799/g170565/g24581/novel.782/g227298/g106581/g320059/g178112/g121480	g332267/g362028/g52799/g170565/g24581/-/g227298/g106581/g320059/g178112/g121480	11	7	g332267/g52799/g170565/g24581/novel.782/g106581/g178112	4	g362028/g227298/g320059/g121480
MF	GO:0060089	molecular transducer activity	2253-11-01	22/11800	0.00105223	0.0411683	g332267/g362028/g52799/g170565/g24581/novel.782/g227298/g106581/g320059/g178112/g121480	g332267/g362028/g52799/g170565/g24581/-/g227298/g106581/g320059/g178112/g121480	11	7	g332267/g52799/g170565/g24581/novel.782/g106581/g178112	4	g362028/g227298/g320059/g121480
MF	GO:0016701	oxidoreductase activity, acting on single donors with incorporation of molecular oxygen	18/2253	46/11800	0.00124886	0.0434325	g240074/g126925/g118736/g62599/g229002/g200721/g202856/g124670/g33293/g177430/g228321/g177431/g202412/g66288/g304306/g147370/novel.310/g311451	g240074/g126925/g118736/g62599/g229002/g200721/g202856/g124670/g33293/g177430/g228321/g177431/g202412/g66288/g304306/g147370/-/g311451	18	11	g240074/g126925/g118736/g62599/g229002/g200721/g202856/g33293/g202412/novel.310/g311451	7	g124670/g177430/g228321/g177431/g66288/g304306/g147370
MF	GO:0016879	ligase activity, forming carbon-nitrogen bonds	17/2253	43/11800	0.00148054	0.0463408	g53143/g320925/g117361/g282345/g29096/g283889/g359713/g49022/g363219/g291180/g300857/g53141/g7514/g360890/g30952/g314343/g319159	g53143/g320925/g117361/g282345/g29096/g283889/g359713/g49022/g363219/g291180/g300857/g53141/g7514/g360890/g30952/g314343/g319159	17	7	g320925/g117361/g282345/g291180/g300857/g30952/g319159	10	g53143/g29096/g283889/g359713/g49022/g363219/g53141/g7514/g360890/g314343
